# Supplementary material
Source: PubMed Central journal article supplement (PMC3095364)

Supporting Information

**Synthesis and separation of the enantiomers of the  
Neuropeptide S receptor antagonist (9R/S)-3-Oxo-1,1-diphenyl-  
tetrahydro-oxazolo[3,4-*a*]pyrazine-7-carboxylic acid 4-fluoro-  
benzylamide (SHA 68)**

Claudio Trapella<sup>§‡</sup>, Michela Pela<sup>§‡</sup>, Luisa Del Zoppo<sup>§</sup>, Girolamo Calo<sup>#</sup>, Valeria  
Camarda<sup>#</sup>, Chiara Ruzza<sup>#</sup>, Alberto Cavazzini<sup>¶</sup>, Valerio Bertolasi<sup>¶</sup>, Valentina  
Costa<sup>¶</sup>, Rainer K. Reinscheid<sup>\*</sup>, Severo Salvadori<sup>§</sup>  
and Remo Guerrini<sup>§\*</sup>

<sup>§</sup>*Department of Pharmaceutical Sciences and Biotechnology Center, and  
<sup>#</sup>Department of Experimental and Clinical Medicine, Section of Pharmacology and  
Neuroscience center, and National Institute of Neuroscience, University of Ferrara,  
via Fossato di Mortara 19, 44100 Ferrara, Italy. <sup>¶</sup>Department of Chemistry,  
University of Ferrara,, via L. Borsari 46, 44100 Ferrara, Italy. <sup>\*</sup>Department of  
Pharmaceutical Sciences, University of California Irvine, 360 Med Surge 2, Irvine,  
CA 92697, USA.*

<sup>‡</sup> These authors contributed equally to this work

\*To whom Correspondence should be addressed.  
Remo Guerrini  
Phone: +39-0532-455-988; Fax: +39-0532-455953  
E-mail: [r.guerrini@unife.it](mailto:r.guerrini@unife.it)

## Contents

|          |                                                                                        |
|----------|----------------------------------------------------------------------------------------|
| page S3  | $^1\text{H}$ -NMR and $^{13}\text{C}$ -NMR spectra of compound 8a                      |
| page S4  | DEPT-NMR and COSY-NMR spectra of compound 8a                                           |
| page S5  | HMBC-NMR and HMQC-NMR spectra of compound 8a                                           |
| page S6  | $^1\text{H}$ -NMR and $^{13}\text{C}$ -NMR spectra of compound 8                       |
| page S7  | DEPT-NMR and COSY-NMR spectra of compound 8                                            |
| page S8  | HMBC-NMR and HMQC-NMR spectra of compound 8                                            |
| page S9  | $^1\text{H}$ -NMR and $^{13}\text{C}$ -NMR spectra of compound 10                      |
| page S10 | DEPT-NMR and COSY-NMR spectra of compound 10                                           |
| page S11 | HMBC-NMR and HMQC-NMR spectra of compound 10                                           |
| page S12 | $^{19}\text{F}$ -NMR spectra of compound 10, $^1\text{H}$ -NMR spectra of compound 10a |
| page S13 | $^{13}\text{C}$ -NMR and DEPT-NMR spectra of compound 10a                              |
| page S14 | COSY-NMR and HMQC-NMR spectra of compound 10a                                          |
| page S15 | HMBC-NMR and $^{19}\text{F}$ -NMR spectra of compound 10a                              |

All the spectra were elaborated using MestreNova 6.0.2 software, and FID data are available on request.



Alta-MA-20\_DEPT  
Alta MA 20

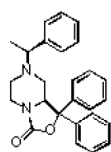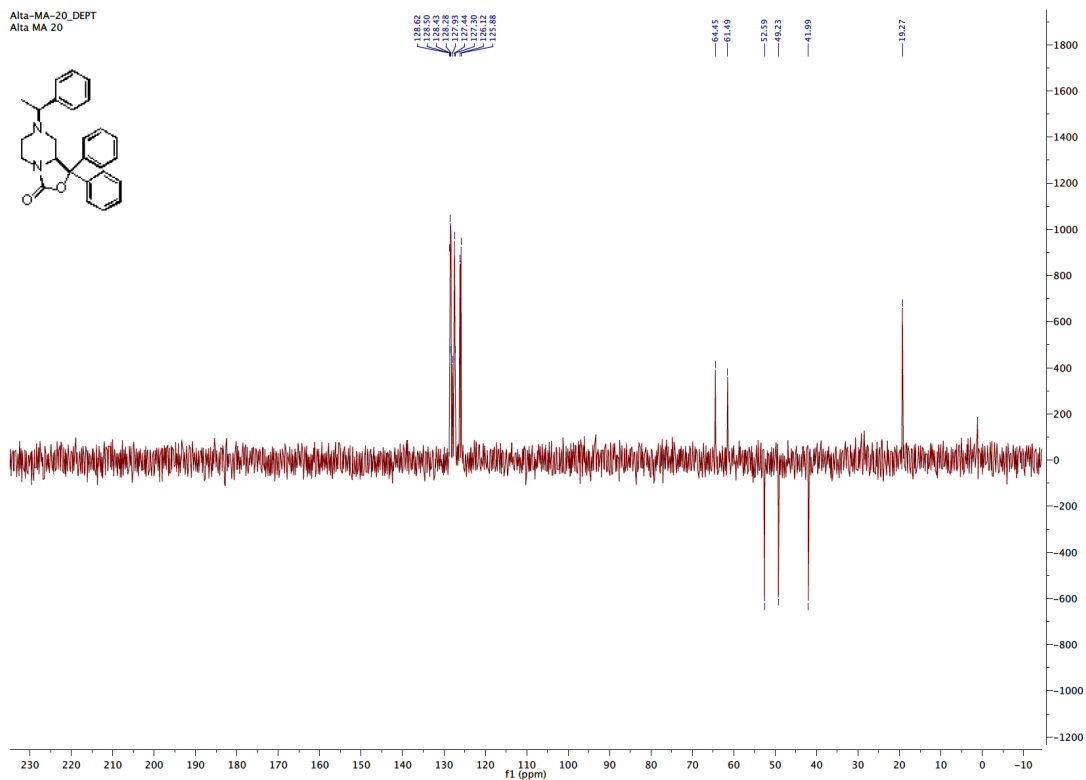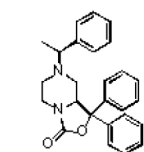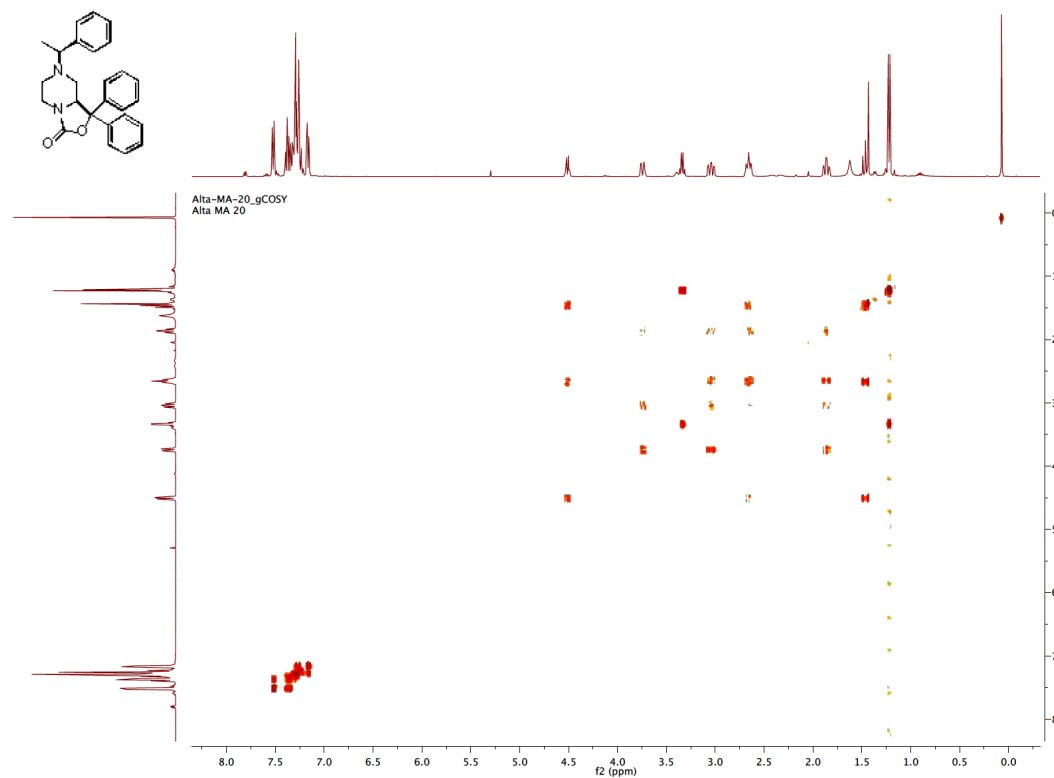

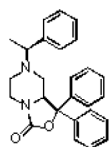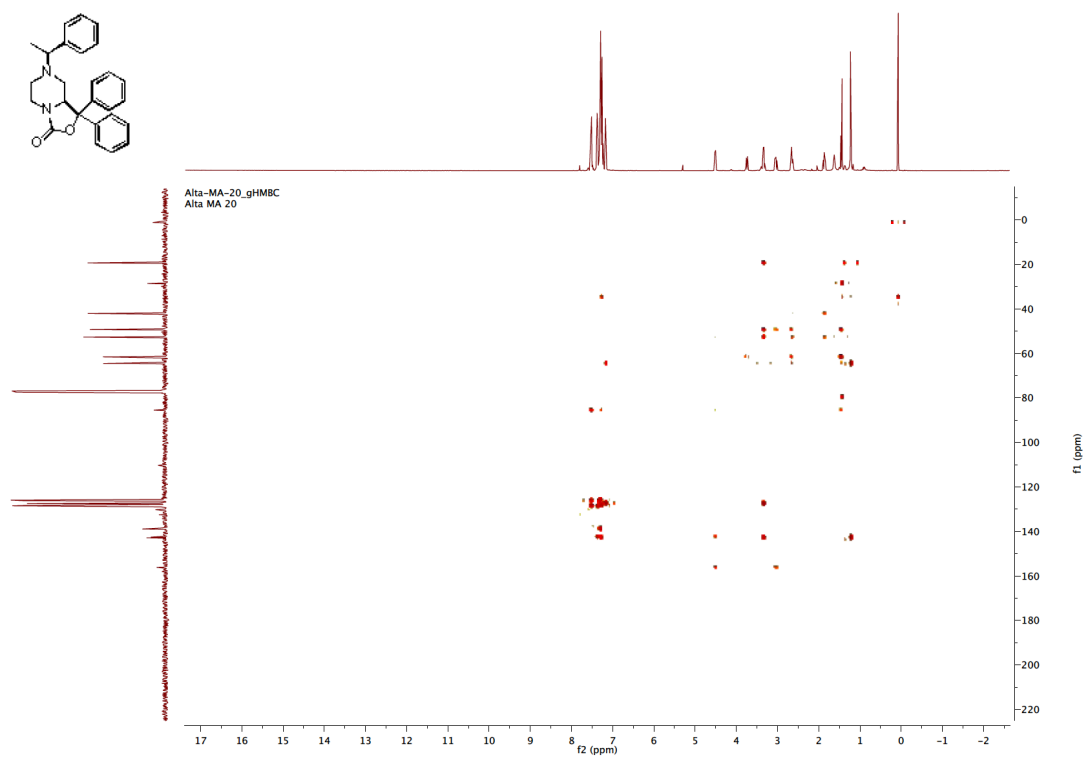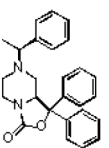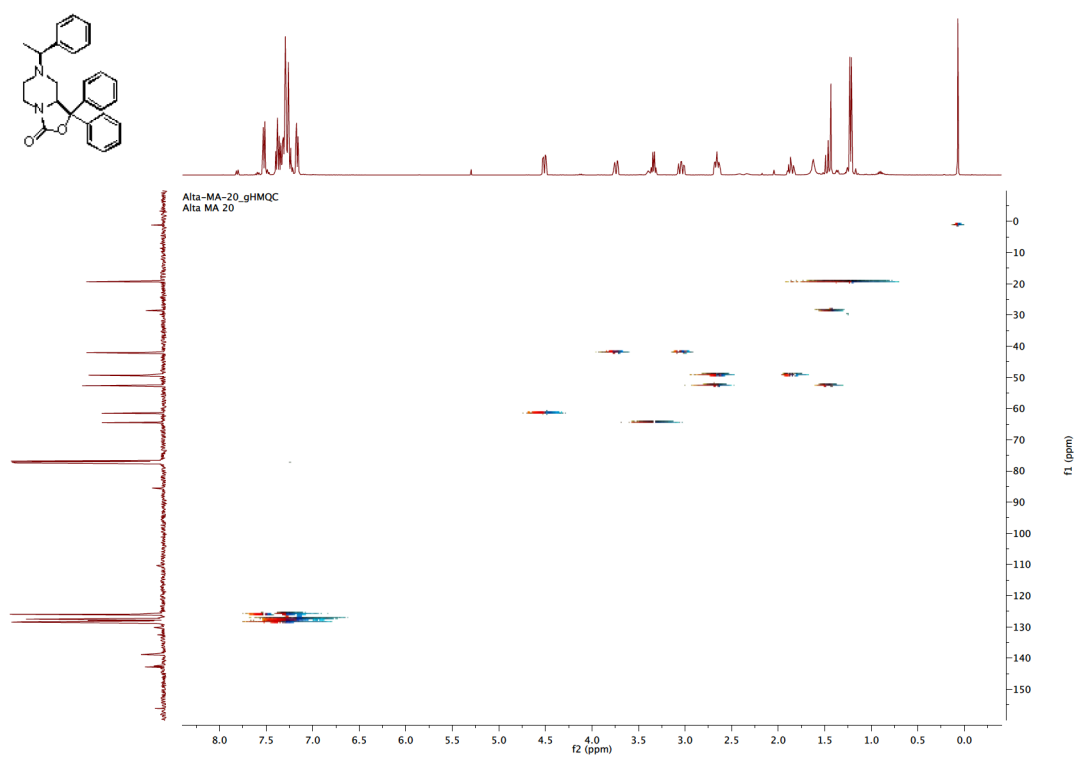

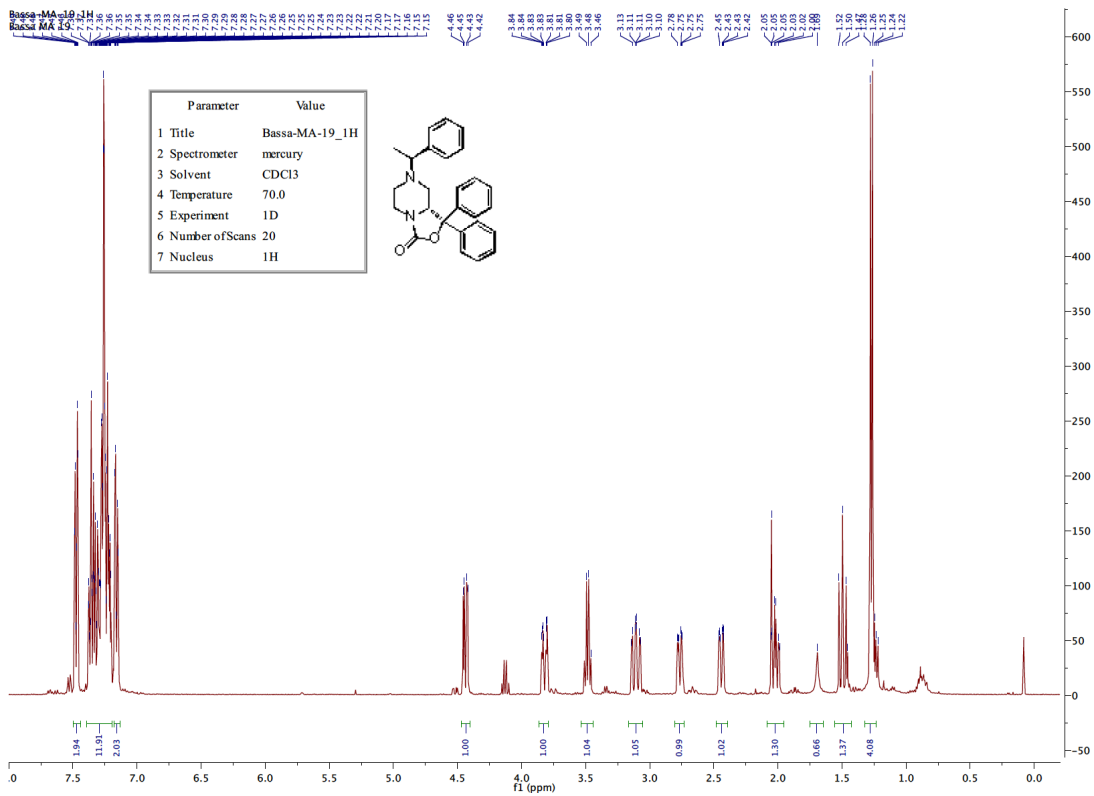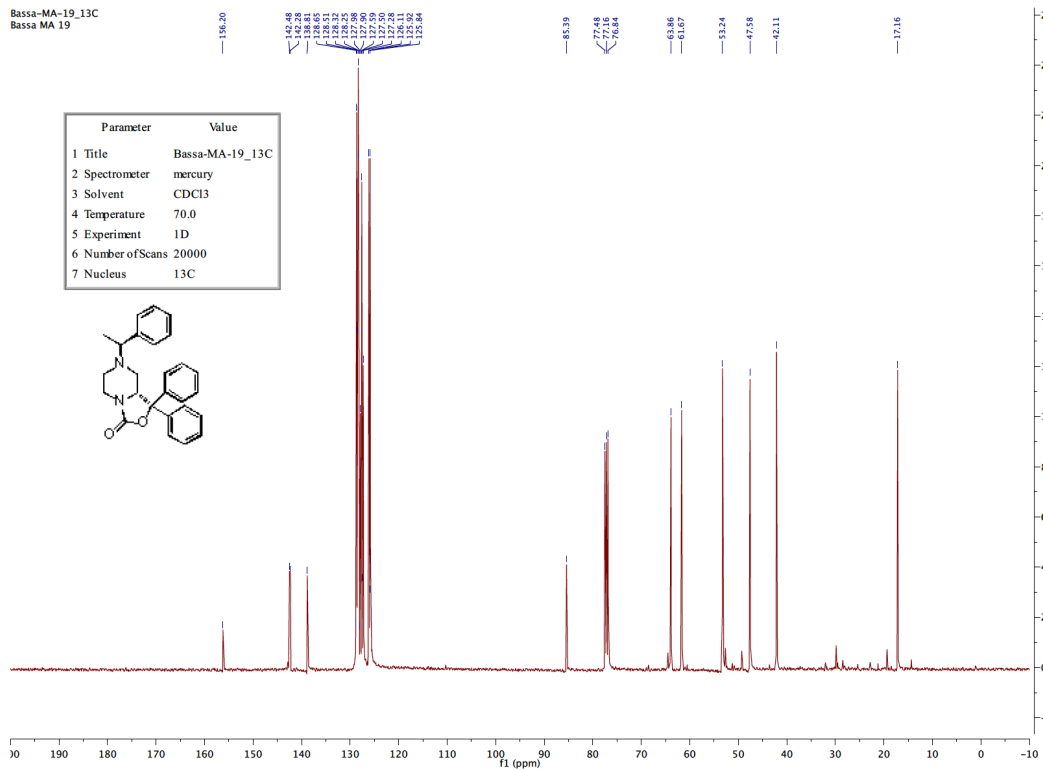

Bassa-MA-19\_Dept  
Alta MA 19

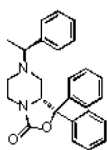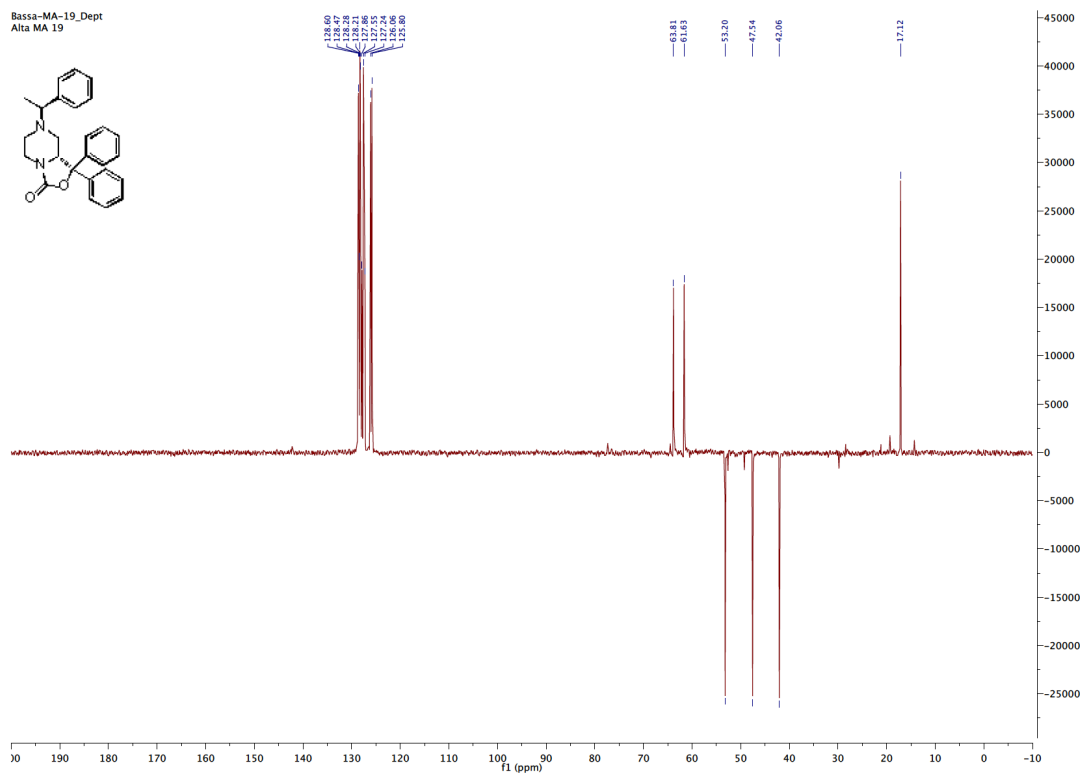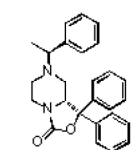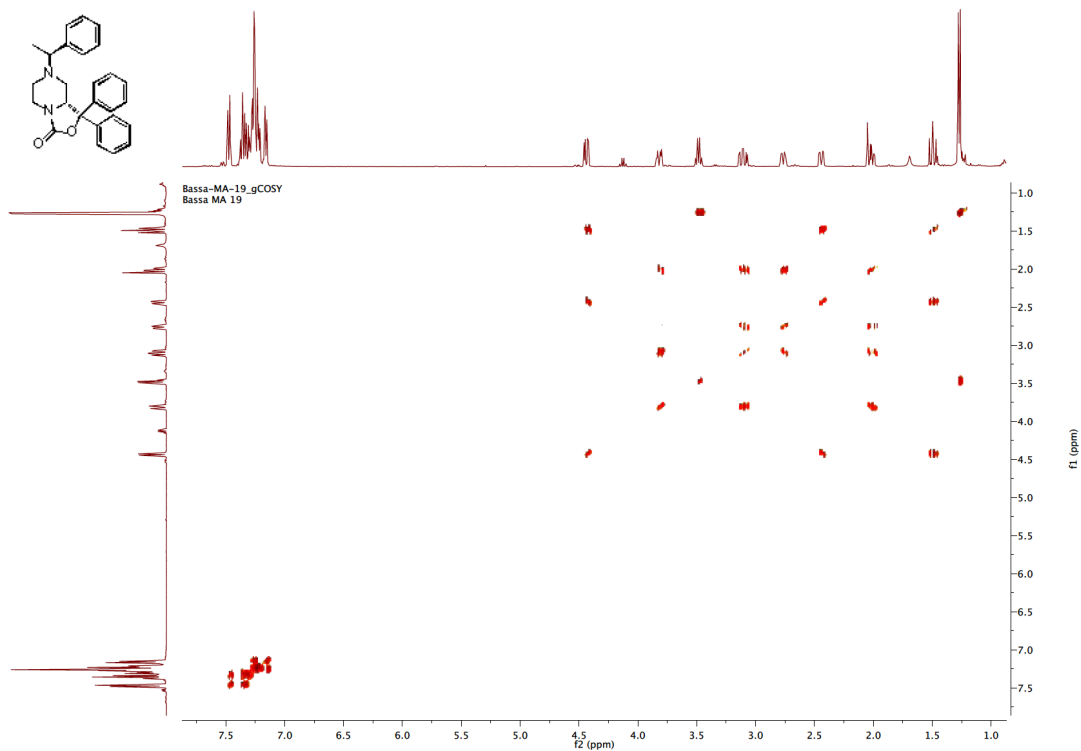

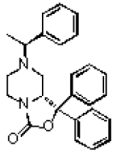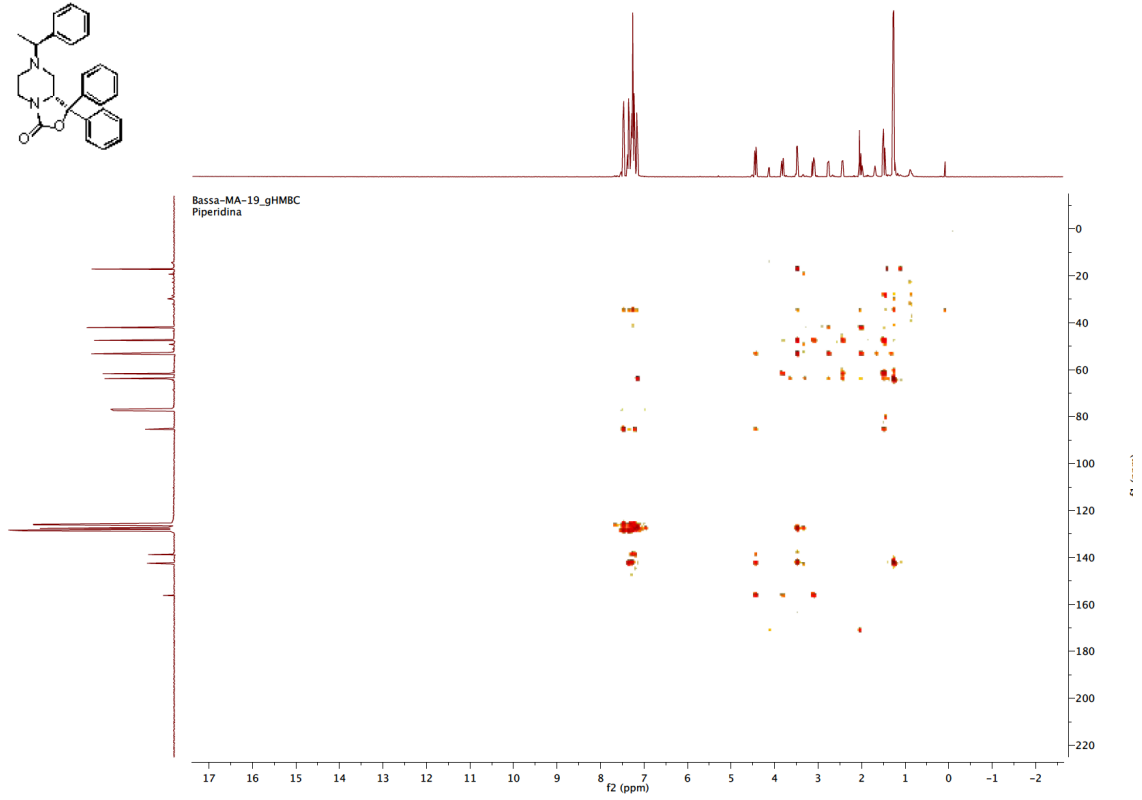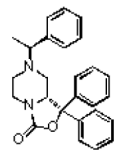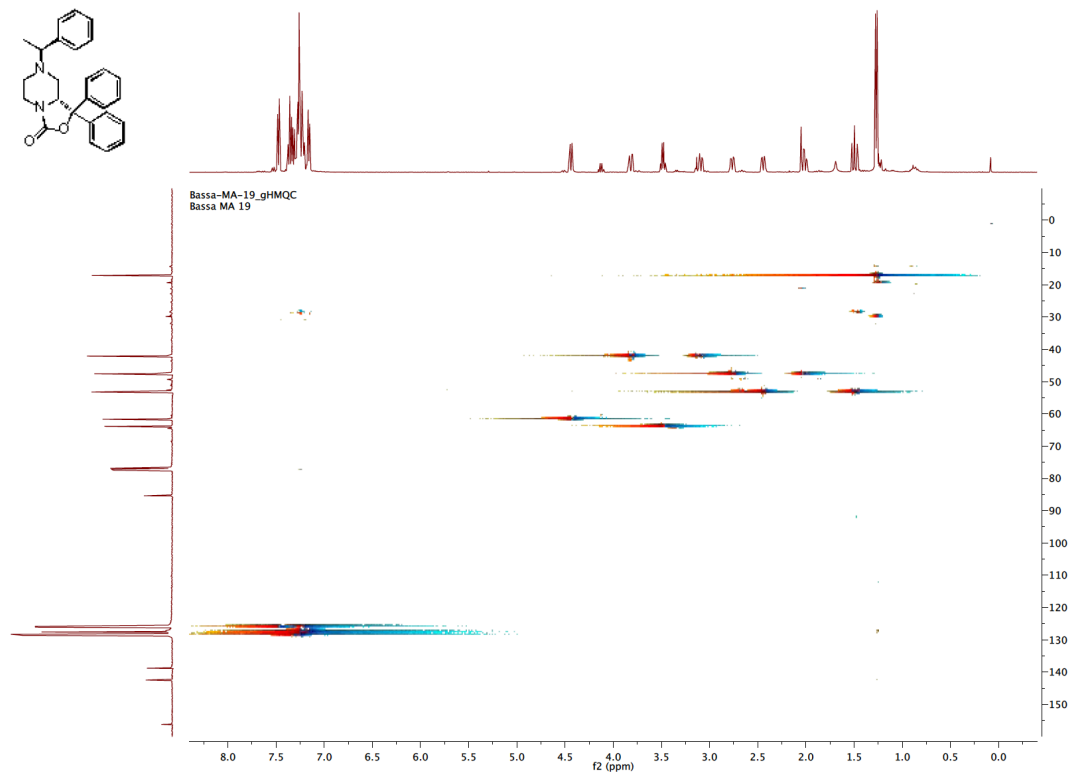



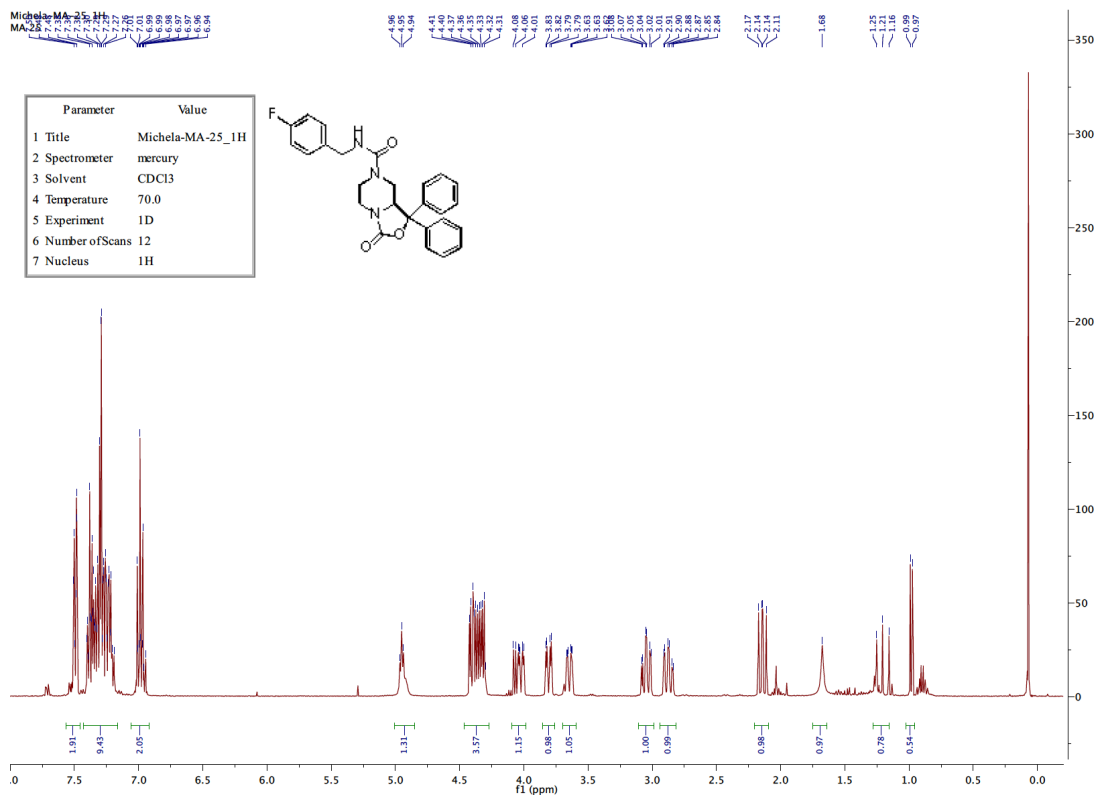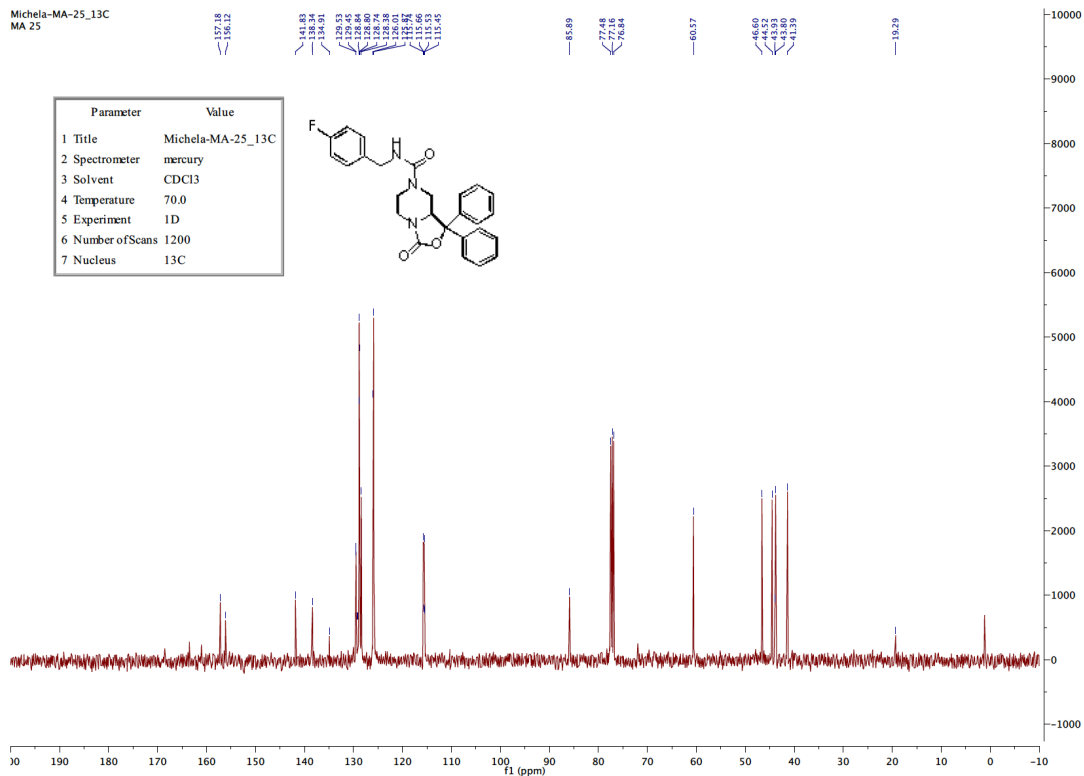

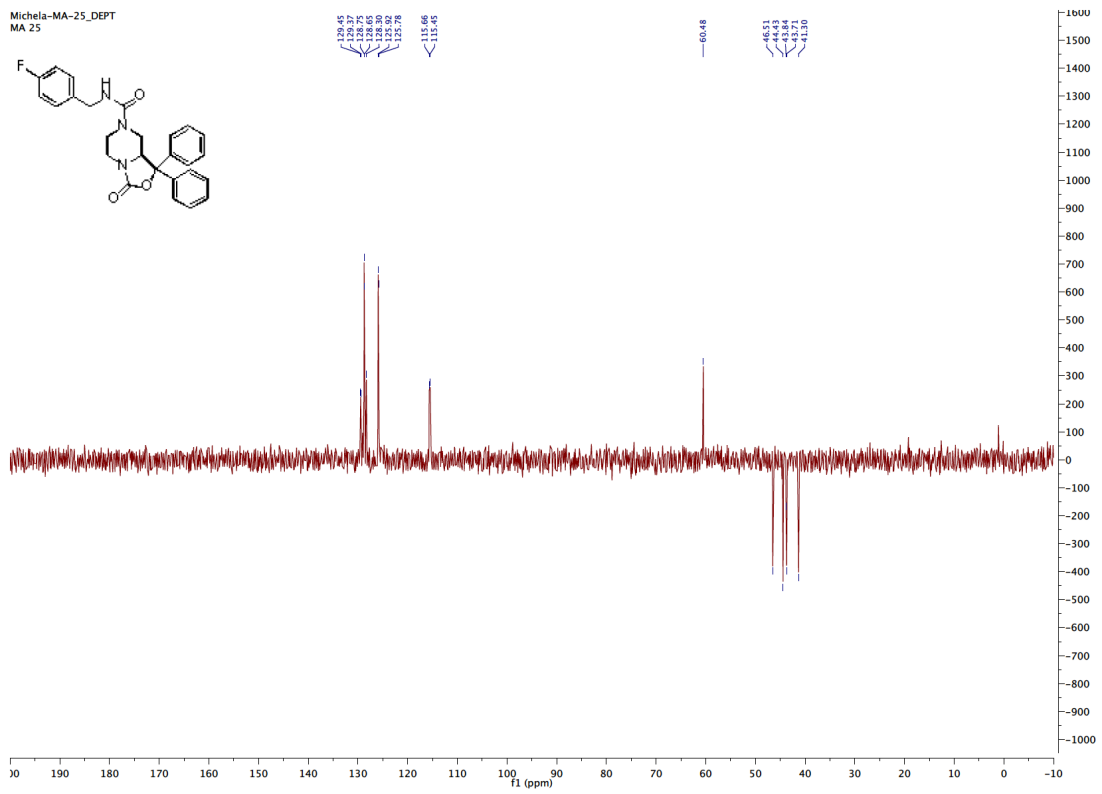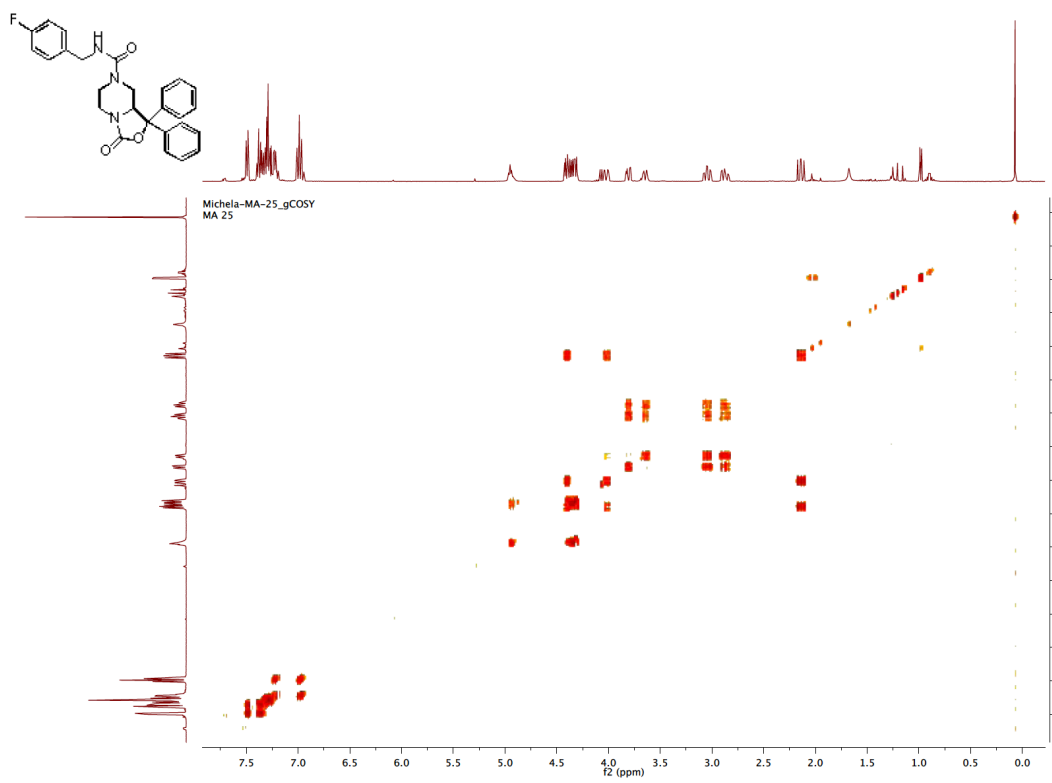

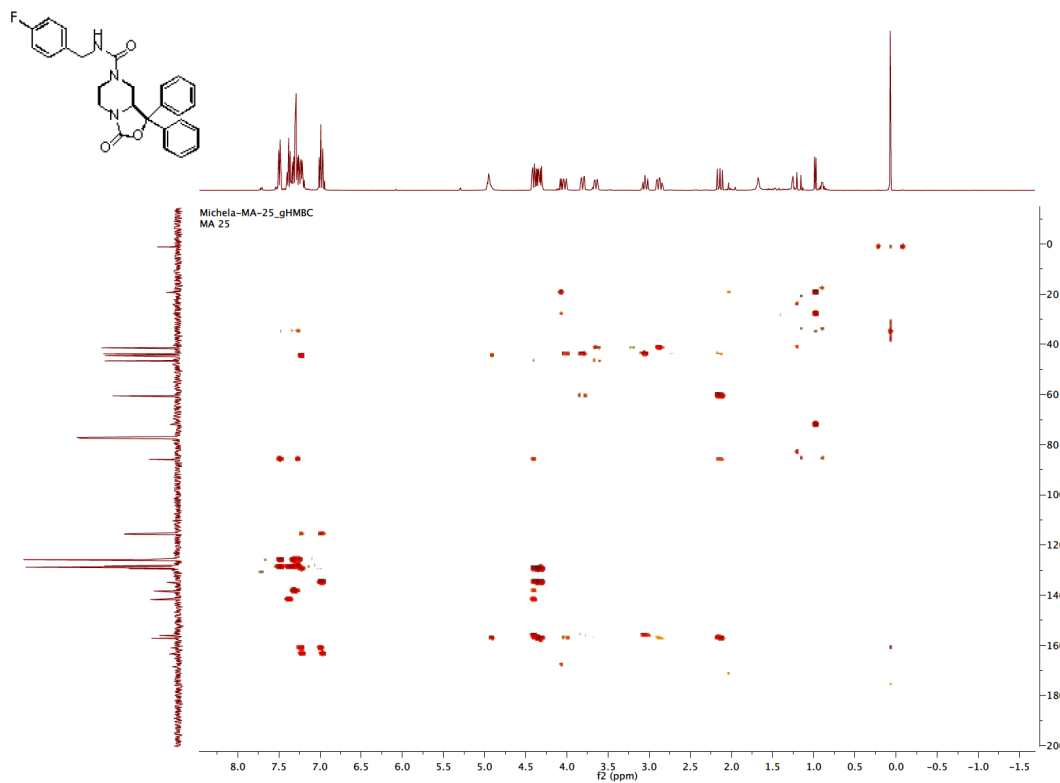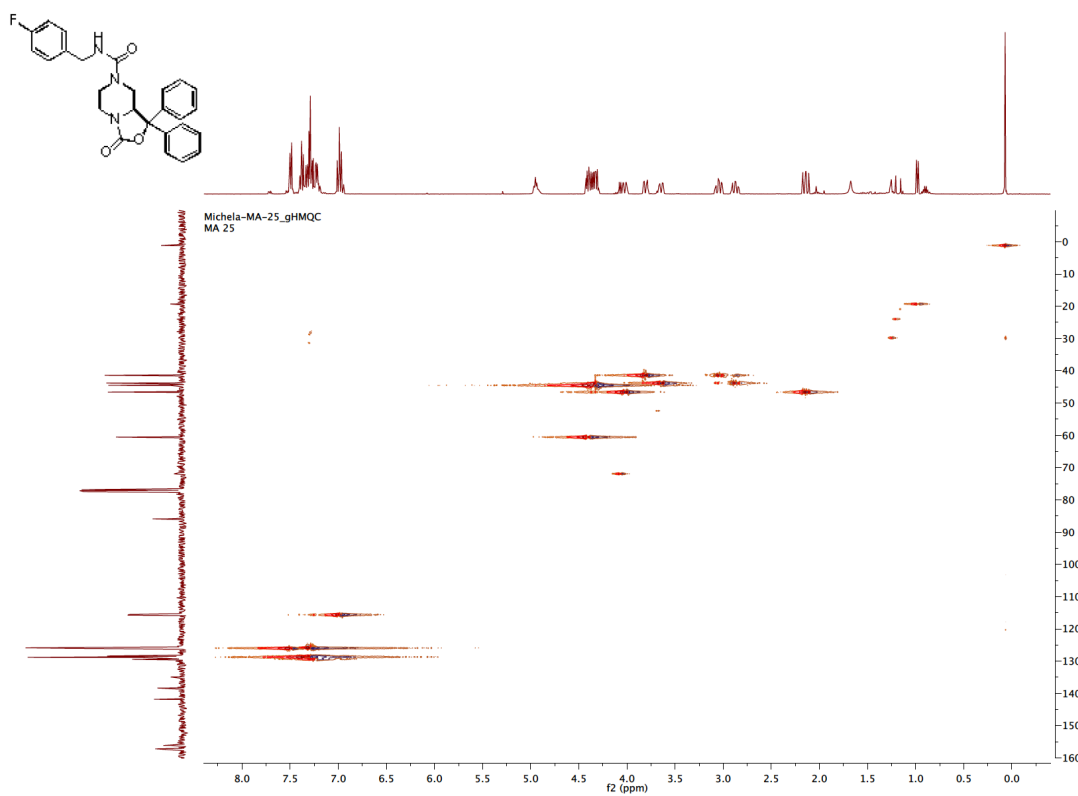



Michela-MA-24\_13C  
MA 24

163.44  
157.20  
156.11  
141.81  
138.30  
134.91  
129.48  
129.41  
128.82  
128.82  
128.72  
125.99  
115.40  
115.40

85.90

77.16  
77.16  
76.84

60.55

46.58  
43.84  
43.78  
41.29

| Parameter         | Value             |
|-------------------|-------------------|
| 1 Title           | Michela-MA-24_13C |
| 2 Spectrometer    | mercury           |
| 3 Solvent         | CDCl3             |
| 4 Temperature     | 70.0              |
| 5 Experiment      | 1D                |
| 6 Number of Scans | 888               |
| 7 Nucleus         | 13C               |

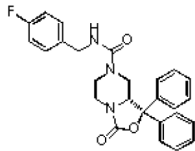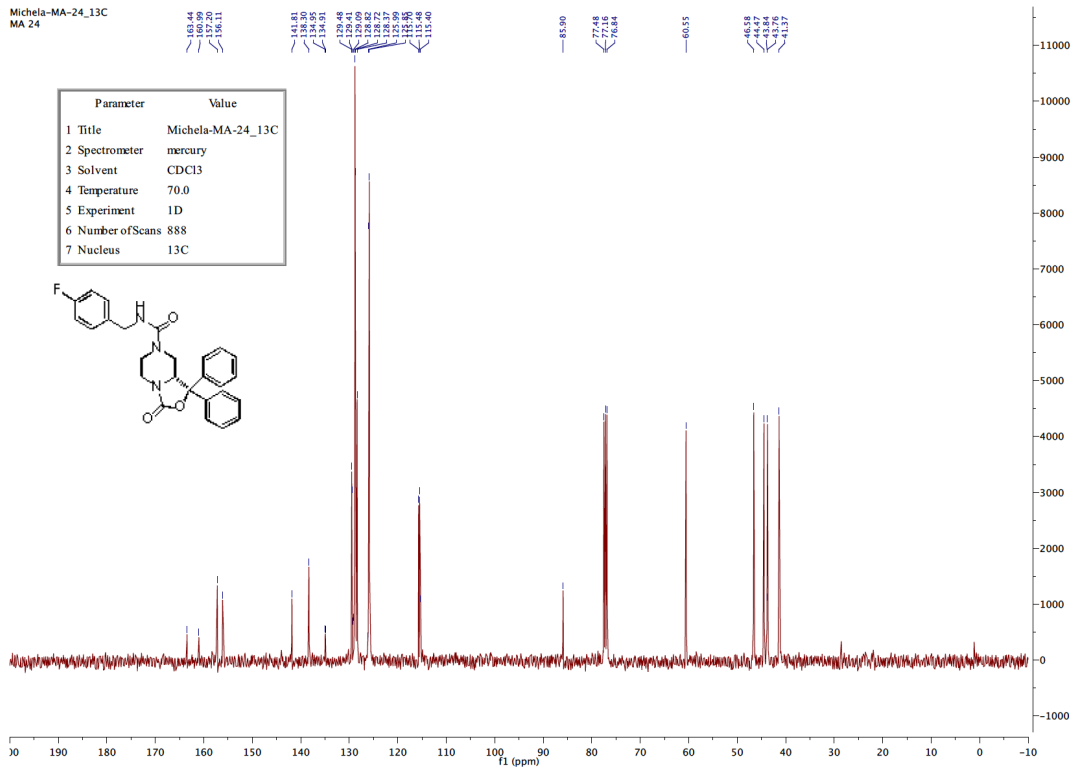

Michela-MA-24\_DEPT  
MA 24

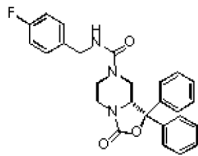

129.42  
129.34  
128.82  
128.82  
128.72  
125.99  
115.44  
115.42

60.48

46.52  
43.78  
43.69  
41.29

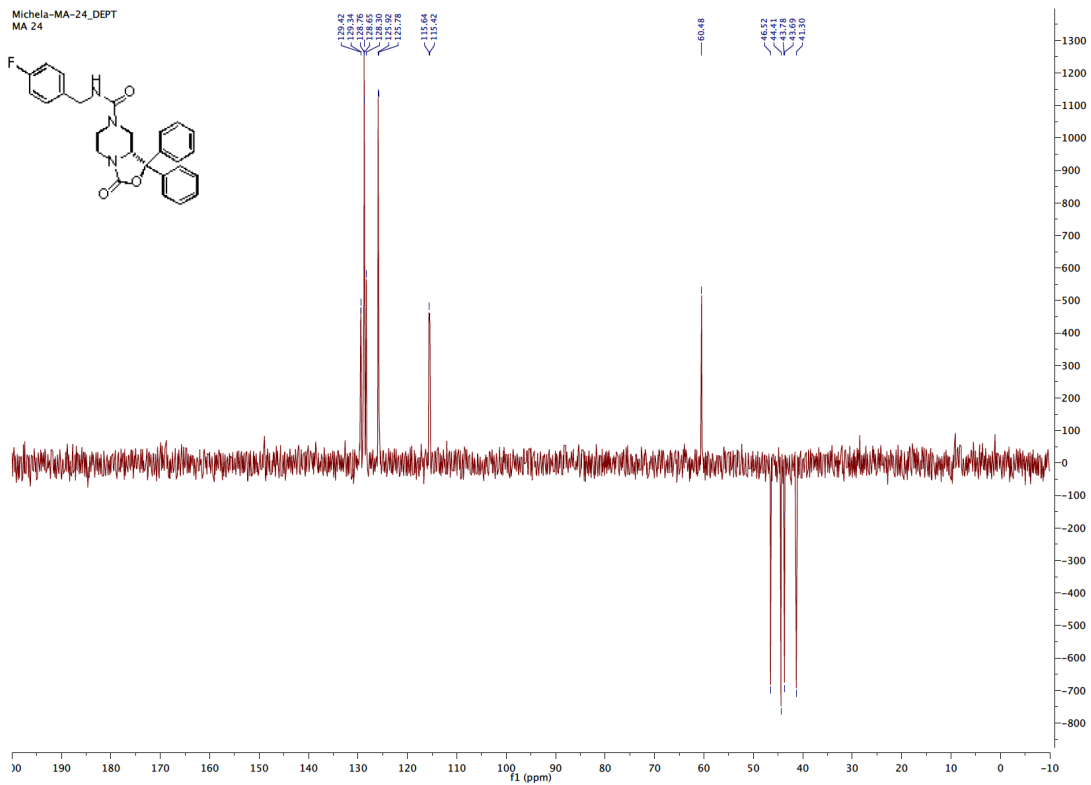

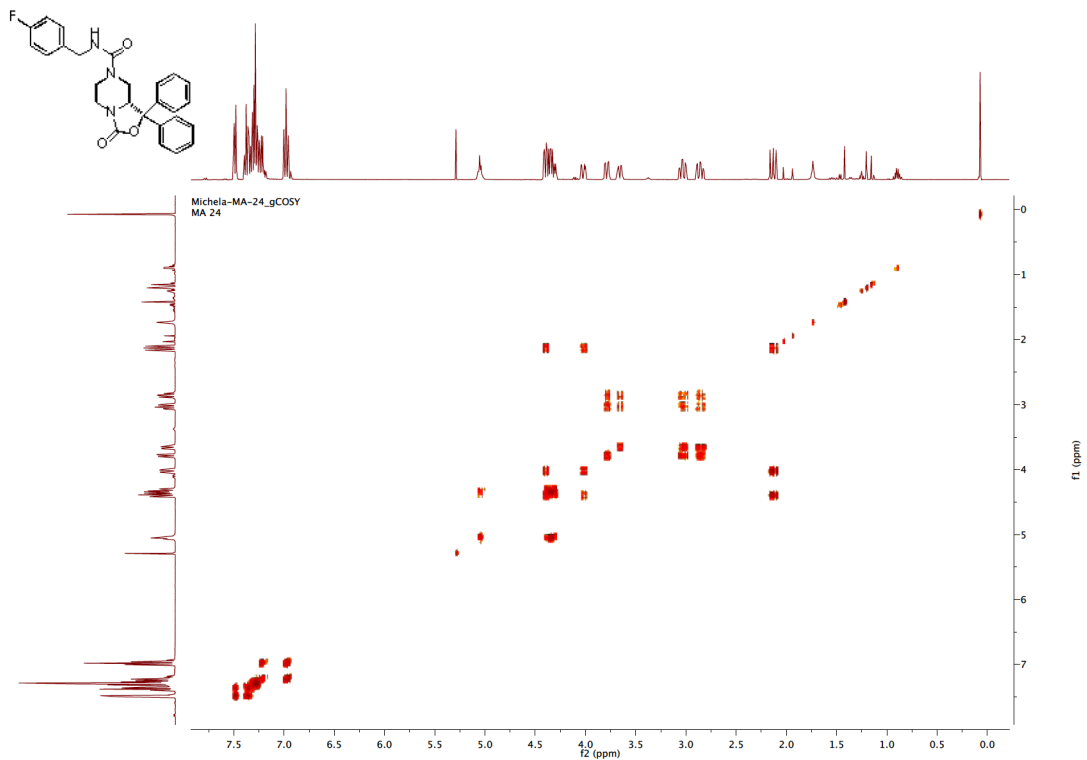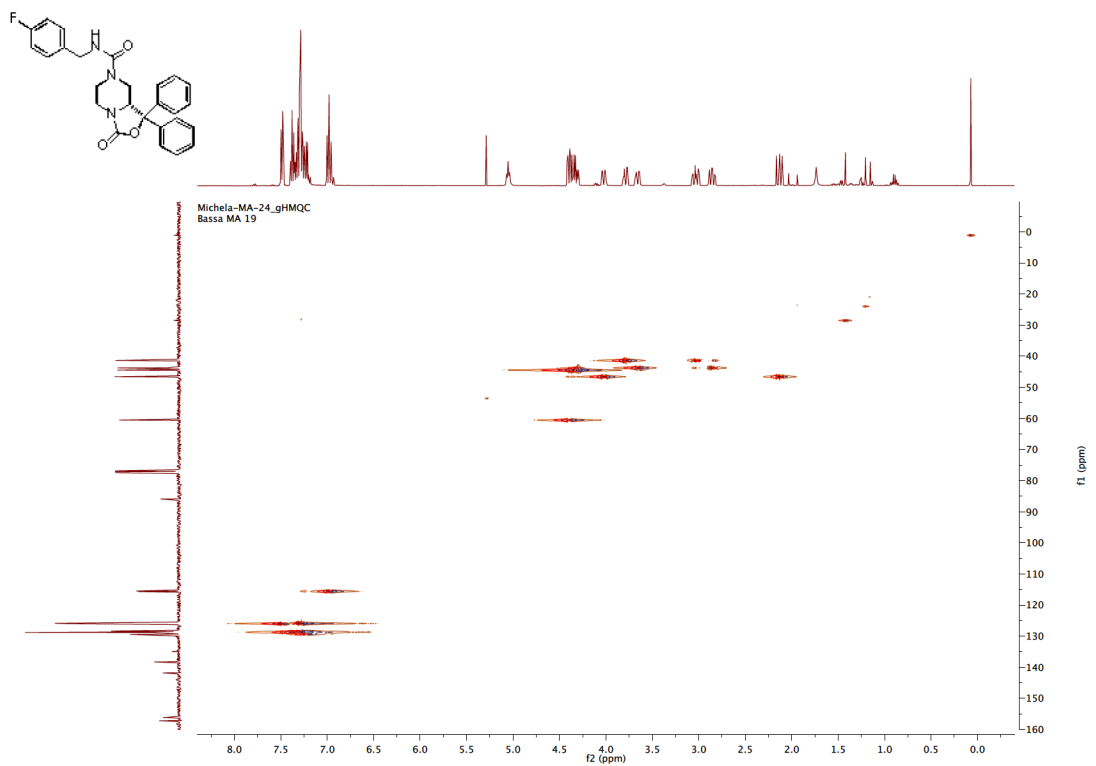

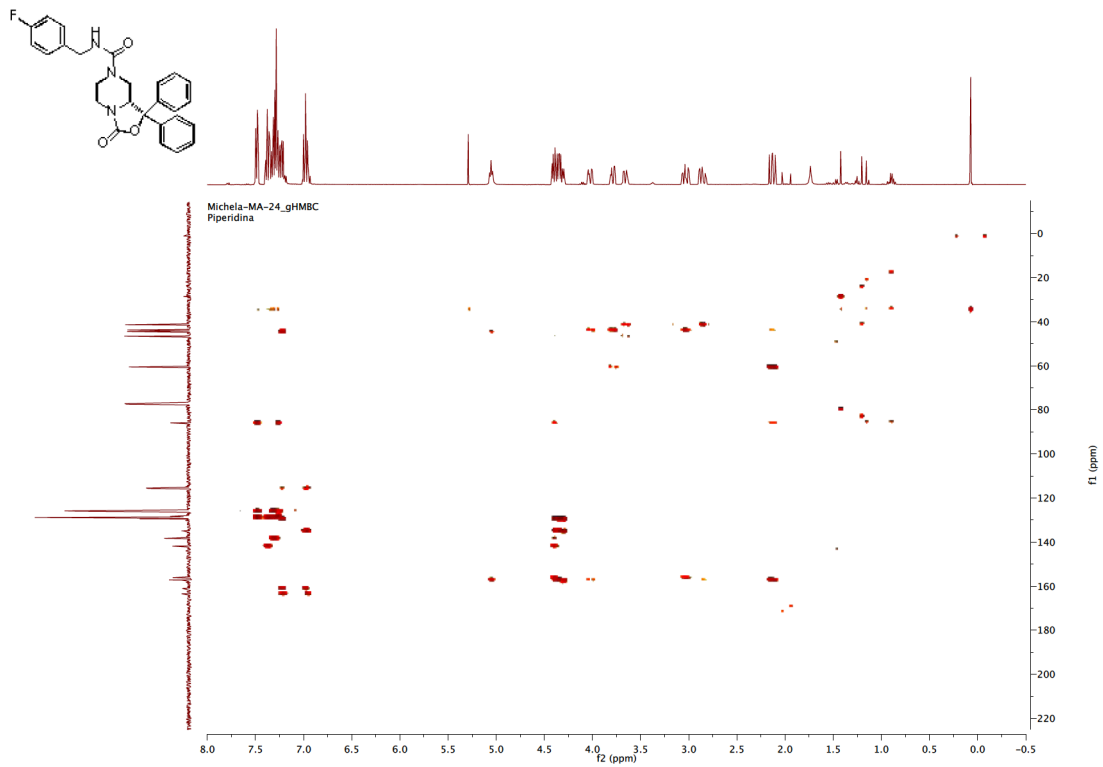

Michela-MA-24\_19F  
MA 24

| Parameter         | Value             |
|-------------------|-------------------|
| 1 Title           | Michela-MA-24_19F |
| 2 Spectrometer    | mercury           |
| 3 Solvent         | CDCl3             |
| 4 Temperature     | 70.0              |
| 5 Experiment      | 1D                |
| 6 Number of Scans | 56                |
| 7 Nucleus         | 19F               |

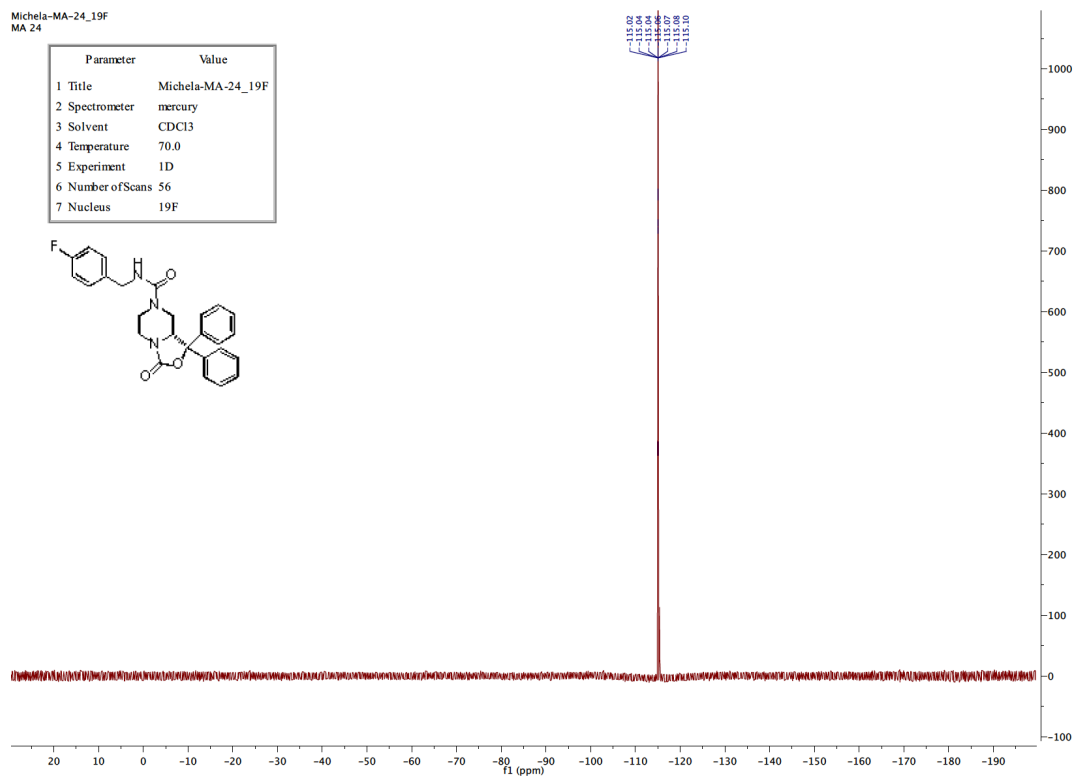

Supplement: NIHMS287116-supplement-1_si_001.pdf [file NIHMS287116-supplement-1_si_001.pdf]
